# Supplementary material for: The half-bridge component Kar1 promotes centrosome separation and duplication during budding yeast meiosis
Source: PubMed Central journal article supplement — Mol Biol Cell. 2018 Aug 1;29(15):1798–810. doi: 10.1091/mbc.E18-03-0163 (PMC6085829; doi:10.1091/mbc.e18-03-0163), 2018-08-01
Supplement: mbc-29-1798-s001.pdf [file mbc-29-1798-s001.pdf]

# Supplemental Materials

*Molecular Biology of the Cell*

Agarwal et al.

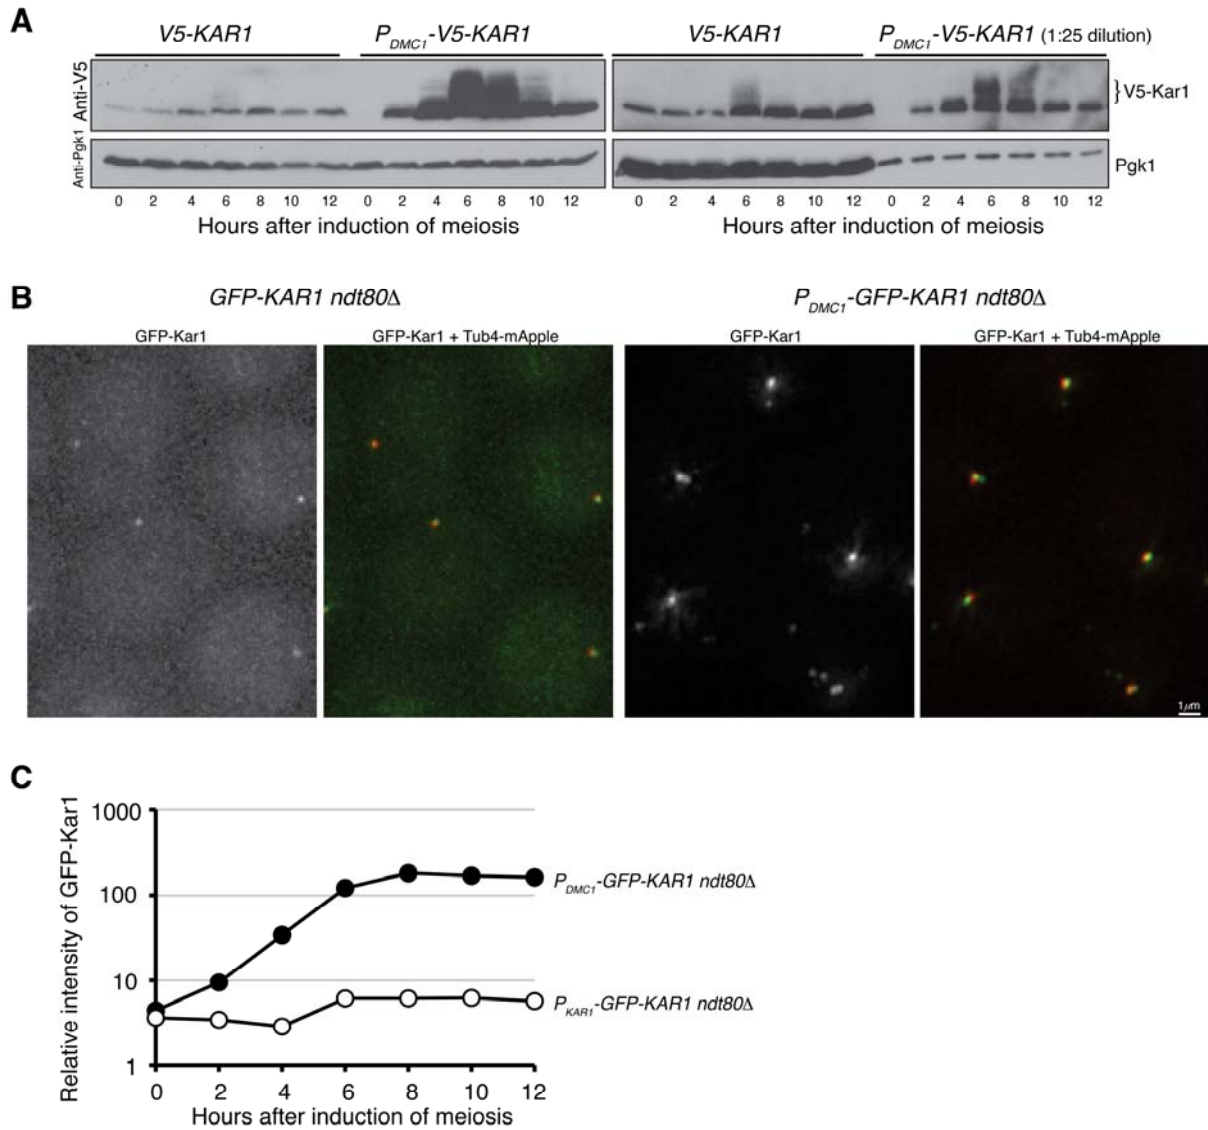

**Supplemental Figure 1.** Quantification of Kar1 overproduction during yeast meiosis. **(A)** Longer exposures of western blots of  $P_{KARI}$ -V5-KAR1 and  $P_{DMC1}$ -V5-KAR1 as shown in Fig 1A. Note that Kar1 appears to be modified post-translationally in meiosis (t=6). **(B)** Representative images showing GFP-Kar1 localization in prophase I cells arrested by  $ndt80\Delta$ . Tub4-mApple marks the SPB. **(C)** Quantification of GFP-Kar1 fluorescence intensity from cells shown in **B**. Yeast cells were induced to undergo synchronous meiosis, and aliquots were withdrawn at indicated time points. Live-cell fluorescence microscopy was performed to determine GFP-Kar1 intensity.

**A**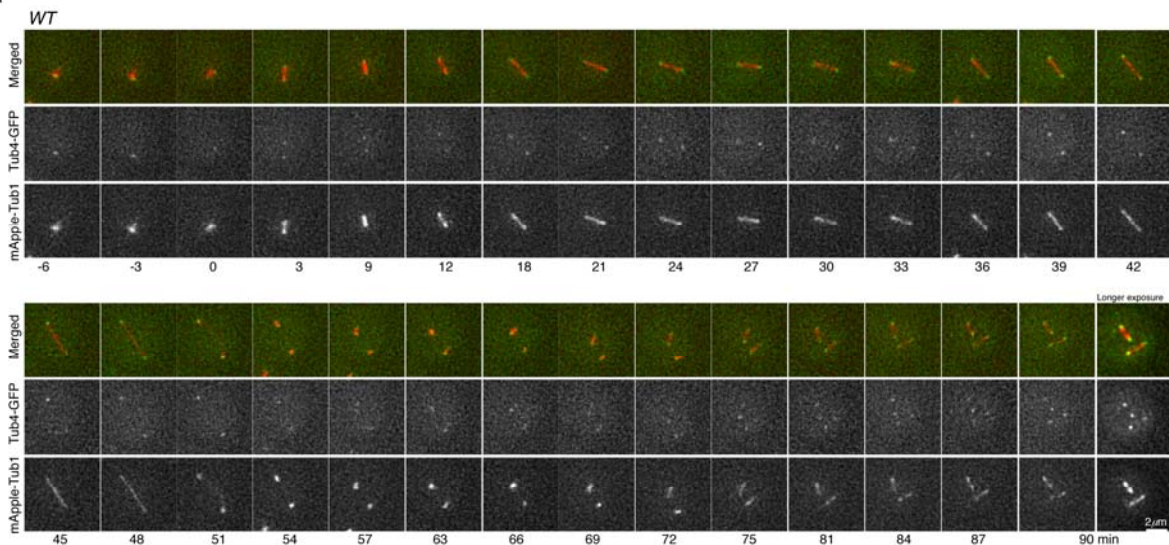**B**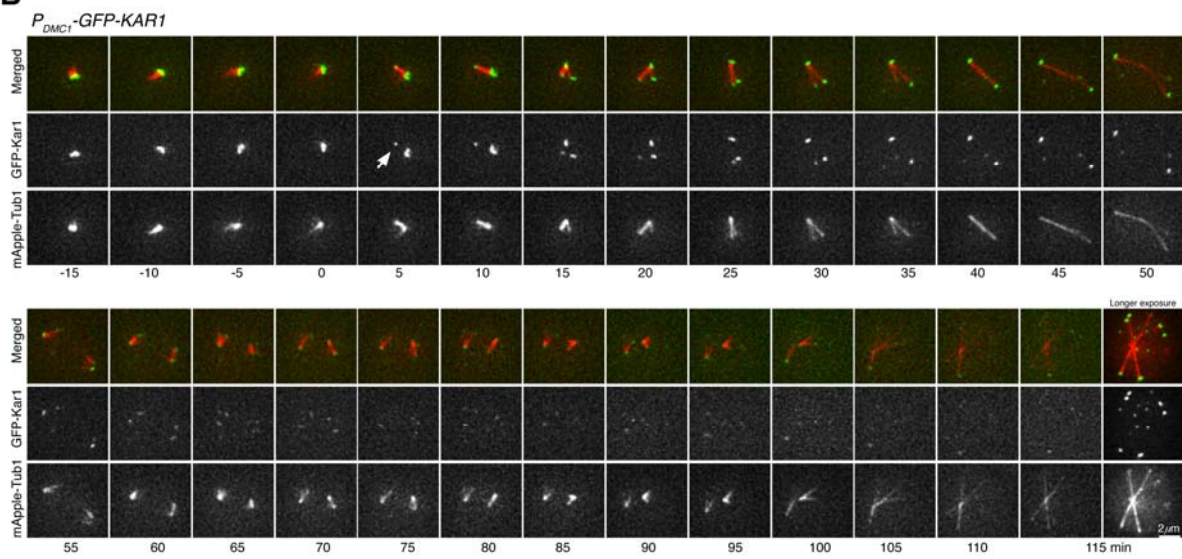**C**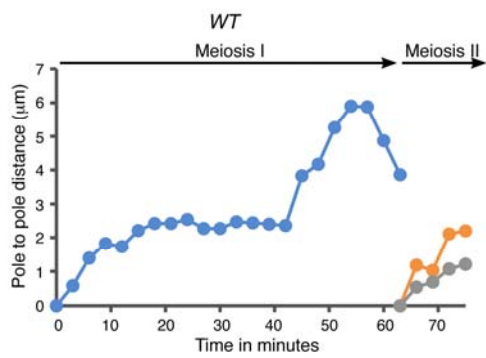**D**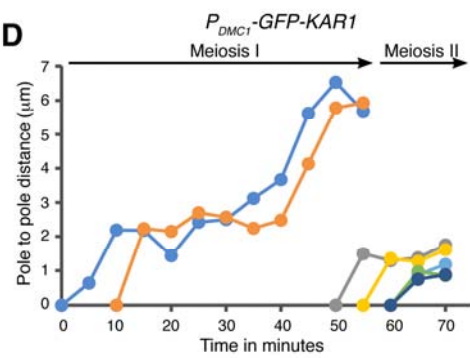

**Supplemental Figure 2.** Microtubule dynamics in Kar1-overproduced cells during yeast meiosis. Yeast cells were induced to undergo synchronous meiosis, and live-cell fluorescence microscopy was performed to determine Tub1-mApple dynamics in cells as shown in Fig 3A. (A) Wild type (*WT*). (B) *P<sub>DMCI</sub>-GFP-KAR1*. (C) Quantification of pole-to-pole distance in the cell shown in A. Time zero refers to the point of SPB separation in meiosis I. (D) Quantification of pole-to-pole distance in the cell shown in B. Note that the third SPB emerged 10 minutes after the first round of SPB separation.

**Table S1.** Yeast strains used in this study

| Strain  | Mating type    | Genotype                                                                                                                                                                                                                                  | Experiment            |
|---------|----------------|-------------------------------------------------------------------------------------------------------------------------------------------------------------------------------------------------------------------------------------------|-----------------------|
| RKY1145 | Mata           | <i>his4-x, ura3, lys2, ho::LYS2, leu2::hisG</i>                                                                                                                                                                                           | Parental strain       |
| S2683   | Mata $\alpha$  | <i>leu2-k, arg4-Nsp, ura3, lys2, ho::LYS2</i>                                                                                                                                                                                             | Parental strain       |
| HY5705  | Mata/ $\alpha$ | <i>his3<math>\Delta</math>200, leu2-k, ura3, lys2, ho::LYS2, P<sub>KAR1</sub>-V5-KAR1::LEU2/<br/>his3<math>\Delta</math>200, leu2-k, ura3, lys2, ho::LYS2, P<sub>KAR1</sub>-V5-KAR1::LEU2</i>                                             | Figures 1A, S1A       |
| HY5704  | Mata/ $\alpha$ | <i>his3<math>\Delta</math>200, leu2-k, ura3, lys2, ho::LYS2, P<sub>DMCI</sub>-V5-KAR1::LEU2/<br/>his3<math>\Delta</math>200, leu2-k, ura3, lys2, ho::LYS2, P<sub>DMCI</sub>-V5-KAR1::LEU2</i>                                             | Figures 1A, S1A       |
| HY5044  | Mata/ $\alpha$ | <i>his3<math>\Delta</math>200, leu2-k, ura3, lys2, ho::LYS2, TUB4-mApple::HIS5,<br/>GFP-KAR1/his3<math>\Delta</math>200, leu2-k, ura3, lys2, ho::LYS2, TUB4-<br/>mApple::HIS5, GFP-KAR1</i>                                               | Figures 1B, 1C,<br>2A |
| HY4915  | Mata/ $\alpha$ | <i>his3<math>\Delta</math>200, leu2-k, ura3, lys2, ho::LYS2, TUB4-mAppleE::HIS5,<br/>P<sub>DMCI</sub>-GFP-KAR1::LEU2/his3<math>\Delta</math>200, leu2-k, ura3, lys2,<br/>ho::LYS2, TUB4-mApple::HIS5, P<sub>DMCI</sub>-GFP-KAR1::LEU2</i> | Figures 1B, 1C,<br>1D |
| HY1635  | Mata/ $\alpha$ | <i>his3<math>\Delta</math>200, leu2-k, ura3, lys2, ho::LYS2, TUB4-mApple::HIS5/<br/>his3<math>\Delta</math>200, leu2-k, ura3, lys2, ho::LYS2, TUB4-mApple::HIS5</i>                                                                       | Figure 1D             |
| HY5483  | Mata/ $\alpha$ | <i>leu2, ura3, SPC42-mApple::HIS5, P<sub>DMCI</sub>-GFP-KAR1::LEU2/<br/>leu2, ura3, SPC42-mApple::HIS5, P<sub>DMCI</sub>-GFP-KAR1::LEU2</i>                                                                                               | Figure 2B             |

|        |                |                                                                                                                                                                                                                                                                                |                                |
|--------|----------------|--------------------------------------------------------------------------------------------------------------------------------------------------------------------------------------------------------------------------------------------------------------------------------|--------------------------------|
| HY2163 | Mata/ $\alpha$ | <i>his3<math>\Delta</math>200, leu2-k, ura3, lys2, ho::LYS2, TUB1-mApple::HIS5/his3<math>\Delta</math>200, leu2-k, ura3, lys2, ho::LYS2, TUB4-GFP::HIS5</i>                                                                                                                    | Figures 3A, S2A, S2C           |
| HY5680 | Mata/ $\alpha$ | <i>his3<math>\Delta</math>200, leu2-k, ura3, lys2, ho::LYS2, P<sub>DMCI</sub>-GFP-KAR1::LEU2/his3<math>\Delta</math>200, leu2-k, ura3, lys2, ho::LYS2, TUB1-mApple::HIS5, P<sub>DMCI</sub>-GFP-KAR1::LEU2</i>                                                                  | Figures 3A, S2B, S2D           |
| HY3950 | Mata/ $\alpha$ | <i>leu2, ura3, HTA1-mApple::HIS5, TUB4-GFP::HIS5/ leu2, ura3, HTA1-mApple::HIS5, TUB4-GFP::HIS5</i>                                                                                                                                                                            | Figures 3B, 3C, 3D, 3E, 4A, 4B |
| HY5603 | Mata/ $\alpha$ | <i>his3<math>\Delta</math>200, leu2-k, ura3, lys2, ho::LYS2, HTA1-mApple::HIS5, P<sub>DMCI</sub>-GFP-KAR1::LEU2/his3<math>\Delta</math>200, leu2-k, ura3, lys2, ho::LYS2, HTA1-mApple::HIS5, P<sub>DMCI</sub>-GFP-KAR1::LEU2</i>                                               | Figures 3B, 3C, 3D, 3E, 4A, 4C |
| HY5759 | Mata/ $\alpha$ | <i>his3<math>\Delta</math>200, leu2-k, ura3, lys2, ho::LYS2, TUB4-mApple::HIS5, P<sub>DMCI</sub>-GFP-kar1<math>\Delta</math>TMD ::LEU2/his3<math>\Delta</math>200, leu2-k, ura3, lys2, ho::LYS2, TUB4-mApple::HIS5, P<sub>DMCI</sub>-GFP-kar1<math>\Delta</math>TMD ::LEU2</i> | Figures 5B, 5C                 |
| HY5766 | Mata/ $\alpha$ | <i>leu2, ura3, ndt80<math>\Delta</math>::HB, TUB4-mApple, P<sub>DMCI</sub>-GFP-kar1<math>\Delta</math>TMD ::LEU2/ leu2, ura3, ndt80<math>\Delta</math>::HB, TUB4-mApple, P<sub>DMCI</sub>-GFP-kar1<math>\Delta</math>TMD ::LEU2</i>                                            | Figure 5D                      |
| HY5840 | Mata/ $\alpha$ | <i>his3<math>\Delta</math>200, leu2-k, ura3, lys2, ho::LYS2, TUB4-mApple::HIS5, P<sub>DMCI</sub>-GFP-kar1<math>\Delta</math>15 ::LEU2/his3<math>\Delta</math>200, leu2-k, ura3, lys2, ho::LYS2, TUB4-mApple::HIS5, P<sub>DMCI</sub>-GFP-kar1<math>\Delta</math>15::LEU2</i>    | Figure 5E                      |
| HY5593 | Mata/ $\alpha$ | <i>leu2, ura3, ndt80<math>\Delta</math>::HB, TUB4-mApple, P<sub>DMCI</sub>-GFP-kar1<math>\Delta</math>15 ::LEU2/ leu2, ura3, ndt80<math>\Delta</math>::HB, TUB4-mApple, P<sub>DMCI</sub>-GFP-kar1<math>\Delta</math>15 ::LEU2</i>                                              | Figure 5F                      |
| HY6077 | Mata/ $\alpha$ | <i>his3<math>\Delta</math>200, leu2-k, ura3, lys2, ho::LYS2, TUB4-mApple::HIS5, P<sub>DMCI</sub>-GFP-kar1<math>\Delta</math>18::LEU2/his3<math>\Delta</math>200, leu2-k, ura3, lys2, ho::LYS2, TUB4-mApple::HIS5, P<sub>DMCI</sub>-GFP-kar1<math>\Delta</math>18::LEU2</i>     | Figure 5G                      |
| HY6078 | Mata/ $\alpha$ | <i>leu2, ura3, ndt80<math>\Delta</math>::HB, TUB4-mApple, P<sub>DMCI</sub>-GFP-kar1<math>\Delta</math>18 ::LEU2/ leu2, ura3, ndt80<math>\Delta</math>::HB, TUB4-mApple, P<sub>DMCI</sub>-GFP-kar1<math>\Delta</math>18::LEU2</i>                                               | Figure 5H                      |

|        |                |                                                                                                                                                                                                                                                                                                                                                               |                          |
|--------|----------------|---------------------------------------------------------------------------------------------------------------------------------------------------------------------------------------------------------------------------------------------------------------------------------------------------------------------------------------------------------------|--------------------------|
| HY4971 | Mata/ $\alpha$ | <i>leu2, ura3, ndt80<math>\Delta</math>::HB, TUB4-mApple::HIS5, P<sub>DMCI</sub>-GFP-KARI::LEU2/ leu2, ura3, ndt80<math>\Delta</math>::HB, TUB4-mApple::HIS5, P<sub>DMCI</sub>-GFP-KARI::LEU2</i>                                                                                                                                                             | Figures 6A, 6B, S1B, S1C |
| HY5091 | Mata/ $\alpha$ | <i>leu2, TUB4-mApple::HIS5, ndt80<math>\Delta</math>::KAN, ura3::P<sub>GPD1</sub>-GAL4.ER::URA3, GFP-KARI/ leu2, TUB4-mApple::HIS5, ndt80<math>\Delta</math>::KAN, ura3::P<sub>GPD1</sub>-GAL4.ER::URA3, GFP-KARI</i>                                                                                                                                         | Figures 6B, S1B, S1C     |
| HY4361 | Mata/ $\alpha$ | <i>ura3, leu2, his4, P<sub>CLB2</sub>-IPL1::KANMX4, TUB4-mApple, ndt80<math>\Delta</math>::HB/ ura3, leu2, his4, P<sub>CLB2</sub>-IPL1::KANMX4, TUB4-mApple, ndt80<math>\Delta</math>::HB</i>                                                                                                                                                                 | Figure 6C                |
| HY5499 | Mata/ $\alpha$ | <i>ura3, leu2, his4, P<sub>CLB2</sub>-IPL1::KANMX4, TUB4-mApple, ndt80<math>\Delta</math>::HB, P<sub>DMCI</sub>-GFP-KARI::LEU2/ ura3, leu2, his4, P<sub>CLB2</sub>-IPL1::KANMX4, TUB4-mApple, ndt80<math>\Delta</math>::HB, P<sub>DMCI</sub>-GFP-KARI::LEU2</i>                                                                                               | Figure 6C                |
| HY5864 | Mata/ $\alpha$ | <i>arg4, leu2, TUB4-mApple::HIS5, ura3::P<sub>GPD1</sub>-GAL4.ER::URA3, P<sub>GAL</sub>-NDT80::TRP1, P<sub>DMCI</sub>-GFP-KARI::LEU2/ arg4, leu2, TUB4-mApple::HIS5, ura3::P<sub>GPD1</sub>-GAL4.ER::URA3, P<sub>GAL</sub>-NDT80::TRP1, P<sub>DMCI</sub>-GFP-KARI::LEU2</i>                                                                                   | Figure 6D                |
| HY5863 | Mata/ $\alpha$ | <i>arg4, leu2, TUB4-mApple::HIS5, ura3::P<sub>GPD1</sub>-GAL4.ER::URA3, P<sub>GAL</sub>-NDT80::TRP1, P<sub>GALI</sub>-GFP-KARI::LEU2/ arg4, leu2, TUB4-mApple::HIS5, ura3::P<sub>GPD1</sub>-GAL4.ER::URA3, P<sub>GAL</sub>-NDT80::TRP1, P<sub>GALI</sub>-GFP-KARI::LEU2</i>                                                                                   | Figure 6E                |
| HY5871 | Mata/ $\alpha$ | <i>ho::LYS2, ura3, leu2::hisG, his3::hisG, P<sub>CLB2</sub>-CDC20::KANMX6, his3<math>\Delta</math>200, leu2-k, ura3, lys2, TUB4-mApple::HIS5, P<sub>DMCI</sub>-GFP-KARI::HIS5/ ho::LYS2, ura3, leu2::hisG, his3::hisG, P<sub>CLB2</sub>-CDC20::KANMX6, his3<math>\Delta</math>200, leu2-k, ura3, lys2, TUB4-mApple::HIS5, P<sub>DMCI</sub>-GFP-KARI::HIS5</i> | Figures 7A, 7B           |
| HY5869 | Mata/ $\alpha$ | <i>ho::LYS2, ura3, leu2::hisG, his3::hisG, P<sub>CLB2</sub>-CDC20::KANMX6, his3<math>\Delta</math>200, leu2-k, ura3, lys2, TUB4-mApple::HIS5/ ho::LYS2, ura3, leu2::hisG, his3::hisG, P<sub>CLB2</sub>-CDC20::KANMX6, his3<math>\Delta</math>200, leu2-k, ura3, lys2, TUB4-mApple::HIS5</i>                                                                   | Figure 7B                |

|        |                |                                                                                                                                                                                                                                                                                                                                                               |           |
|--------|----------------|---------------------------------------------------------------------------------------------------------------------------------------------------------------------------------------------------------------------------------------------------------------------------------------------------------------------------------------------------------------|-----------|
| HY5952 | Mata/ $\alpha$ | <i>leu2, ura3, SFII-GFP::HIS5, TUB4-mApple, PCLB2-CDC20::KANMX6, P<sub>DMC1</sub>-V5-KAR1::LEU2/ leu2, ura3, SFII-GFP::HIS5, TUB4-mApple, PCLB2-CDC20::KANMX6</i>                                                                                                                                                                                             | Figure 7C |
| HY5929 | Mata/ $\alpha$ | <i>ho::LYS2, ura3, leu2::hisG, his3::hisG, P<sub>CLB2</sub>-CDC20::KANMX6, his3<math>\Delta</math>200, leu2-k, ura3, lys2, MPS3-mApple::HIS5, P<sub>DMC1</sub>-GFP-KAR1::HIS5/ ho::LYS2, ura3, leu2::hisG, his3::hisG, P<sub>CLB2</sub>-CDC20::KANMX6, his3<math>\Delta</math>200, leu2-k, ura3, lys2, MPS3-mApple::HIS5, P<sub>DMC1</sub>-GFP-KAR1::HIS5</i> | Figure 7D |
| HY6020 | Mata/ $\alpha$ | <i>leu2, ura3, P<sub>CLB2</sub>-CDC20::KANMX6, TUB1-mApple::HIS5, P<sub>DMC1</sub>-GFP-KAR1::HIS5/ leu2, ura3, PCLB2-CDC20::KANMX6</i>                                                                                                                                                                                                                        | Figure 7E |
| HY3204 | Mata/ $\alpha$ | <i>ura3, leu2, P<sub>CLB2</sub>-CDC5::KAN, TUB4-mApple::HIS5/ ura3, leu2, P<sub>CLB2</sub>-CDC5::KAN, TUB4-mApple::HIS5</i>                                                                                                                                                                                                                                   | Figure 7F |
| HY5760 | Mata/ $\alpha$ | <i>ura3, leu2, P<sub>CLB2</sub>-CDC5::KAN, TUB4-mApple::HIS5, P<sub>DMC1</sub>-GFP-KAR1::LEU2/ ura3, leu2, P<sub>CLB2</sub>-CDC5::KAN, TUB4-mApple::HIS5, P<sub>DMC1</sub>-GFP-KAR1::LEU2</i>                                                                                                                                                                 | Figure 7G |
| HY3654 | Mata/ $\alpha$ | <i>his4-x, ura3, lys2, ho::LYS2, leu2::hisG, P<sub>CLB2</sub>-SFII::KAN, TUB4-mApple::HB/leu2-k, arg4-Nsp, ura3, lys2, ho::LYS2, P<sub>CLB2</sub>-SFII::KAN, TUB4-mApple::HB</i>                                                                                                                                                                              | Figure 8A |
| HY5773 | Mata/ $\alpha$ | <i>his4-x, ura3, leu2, hisG, P<sub>CLB2</sub>-SFII::KANMX, TUB4-mApple::HB, P<sub>DMC1</sub>-SFII::URA3/leu2-k, arg4-Nsp, ura3, P<sub>CLB2</sub>-SFII::KANMX, TUB4-mApple::HB, P<sub>DMC1</sub>-SFII::URA3</i>                                                                                                                                                | Figure 8B |
| HY5652 | Mata/ $\alpha$ | <i>his4-x, ura3, lys2, ho::LYS2, leu2::hisG, P<sub>CLB2</sub>-SFII::KAN, TUB4-mApple::HB, P<sub>DMC1</sub>-GFP-KAR1::LEU2/leu2-k, arg4-Nsp, ura3, lys2, ho::LYS2, P<sub>CLB2</sub>-SFII::KAN, TUB4-mApple::HB, P<sub>DMC1</sub>-GFP-KAR1::LEU2</i>                                                                                                            | Figure 8C |
| HY5719 | Mata/ $\alpha$ | <i>his4-x, ura3, lys2, ho::LYS2, leu2::hisG, P<sub>CLB2</sub>-SFII::KAN, TUB4-mApple::HB, P<sub>DMC1</sub>-sfi1-6D::URA3/leu2-k, arg4-Nsp, ura3, lys2, ho::LYS2, P<sub>CLB2</sub>-SFII::KAN, TUB4-mApple::HB, P<sub>DMC1</sub>-sfi1-6D::URA3</i>                                                                                                              | Figure 8D |

|        |                |                                                                                                                                                                                                                                                                                                                    |           |
|--------|----------------|--------------------------------------------------------------------------------------------------------------------------------------------------------------------------------------------------------------------------------------------------------------------------------------------------------------------|-----------|
| HY5718 | Mata/ $\alpha$ | <i>his4-x, ura3, lys2, ho::LYS2, leu2::hisG, P<sub>CLB2</sub>-SFII::KAN, TUB4-mApple::HB, P<sub>DMC1</sub>-sfi1-6A::URA3/leu2-k, arg4-Nsp, ura3, lys2, ho::LYS2, P<sub>CLB2</sub>-SFII::KAN, TUB4-mAppleE::HB, P<sub>DMC1</sub>-sfi1-6A::URA3</i>                                                                  | Figure 8E |
| HY5702 | Mata/ $\alpha$ | <i>his4-x, ura3, lys2, ho::LYS2, leu2::hisG, P<sub>CLB2</sub>-SFII::KAN, TUB4-mApple::HB, P<sub>DMC1</sub>-sfi1-6D::URA3, P<sub>DMC1</sub>-GFP-KARI::LEU2/leu2-k, arg4-Nsp, ura3, lys2, ho::LYS2, P<sub>CLB2</sub>-SFII::KAN, TUB4-mApple::HB, P<sub>DMC1</sub>-sfi1-6D::URA3, P<sub>DMC1</sub>-GFP-KARI::LEU2</i> | Figure 8F |
| HY5720 | Mata/ $\alpha$ | <i>his4-x, ura3, lys2, ho::LYS2, leu2::hisG, P<sub>CLB2</sub>-SFII::KAN, TUB4-mApple::HB, P<sub>DMC1</sub>-sfi1-6A::URA3, P<sub>DMC1</sub>-GFP-KARI::LEU2/leu2-k, arg4-Nsp, ura3, lys2, ho::LYS2, P<sub>CLB2</sub>-SFII::KAN, TUB4-mApple::HB, P<sub>DMC1</sub>-sfi1-6A::URA3, P<sub>DMC1</sub>-GFP-KARI::LEU2</i> | Figure 8G |
| HY2074 | Mata/ $\alpha$ | <i>leu2, ura3, TUB4-mApple::HIS5, P<sub>CLB2</sub>-CDC14::KAN/leu2, ura3, TUB4-mApple::HIS5, P<sub>CLB2</sub>-CDC14::KAN</i>                                                                                                                                                                                       | Figure 8H |
| HY5772 | Mata/ $\alpha$ | <i>leu2, ura3, TUB4-mApple::HIS5, P<sub>CLB2</sub>-CDC14::KAN, P<sub>DMC1</sub>-GFP-KARI::LEU2/leu2, ura3, TUB4-mApple::HIS5, P<sub>CLB2</sub>-CDC14::KAN, P<sub>DMC1</sub>-GFP-KARI::LEU2</i>                                                                                                                     | Figure 8I |

---



**Table S2.** Plasmids used in this study.

| <b>Plasmid name</b> | <b>Description</b>                                            |
|---------------------|---------------------------------------------------------------|
| pHG254              | <i>P<sub>DMCI</sub>-SFII, URA3</i>                            |
| pHG433              | <i>P<sub>DMCI</sub>-GFP-KARI, LEU2</i>                        |
| pHG434              | <i>P<sub>DMCI</sub>-SFII-6A, URA3</i>                         |
| pHG435              | <i>P<sub>DMCI</sub>-SFII-6D, URA3</i>                         |
| pHG465              | <i>P<sub>KARI</sub>-GFP-KARI, URA3</i>                        |
| pHG331              | <i>P<sub>GALI</sub>-GFP-KARI, LEU2</i>                        |
| pHG524              | <i>P<sub>DMCI</sub>-GFP-KARI-<math>\Delta</math>15, LEU2</i>  |
| pHG614              | <i>P<sub>DMCI</sub>-GFP-KARI-<math>\Delta</math>18, LEU2</i>  |
| pHG549              | <i>P<sub>DMCI</sub>-GFP-KARI-<math>\Delta</math>TMD, LEU2</i> |
| pHG535              | <i>P<sub>DMCI</sub>-V5-KARI, LEU2</i>                         |
| pHG536              | <i>P<sub>KARI</sub>-V5-KARI, LEU2</i>                         |
